# Supplementary material for: Evaluating AI-Assistance for Pathologists in Diagnosing and Grading Laryngeal Lesions
Source: bioRxiv or medRxiv preprint supplement (doi:10.1101/2023.07.23.23292962), 2023-10-06
Supplement: Supplementary file [file media-1.pdf]

| <b>Characteristics</b>                        | <b>Training and Validation Sets</b> | <b>Reference Standard Test Set</b> | <b>External Set</b> |
|-----------------------------------------------|-------------------------------------|------------------------------------|---------------------|
| <b>Number of patients</b>                     | 456                                 | 101                                | 67                  |
| Male                                          | 376 (82.5%)                         | 79 (78.2%)                         | 14 (20.9%)          |
| Female                                        | 80 (17.5%)                          | 22 (21.8%)                         | 53 (79.1%)          |
| <b>Number of samples</b>                      | 677                                 | 115                                | 72                  |
| Biopsies                                      | 460 (67.9%)                         | 115 (100%)                         | 71 (98.6%)          |
| Surgical resections                           | 217 (32.1%)                         | 0 (0%)                             | 1 (1.4%)            |
| <b>Anatomical location</b>                    |                                     |                                    |                     |
| Larynx                                        | 562                                 | 68                                 | 77                  |
| Pharynx                                       | 142                                 | 21                                 | 10                  |
| <b>Number of slides</b>                       | 1949                                | 115                                | 87                  |
| Biospies                                      | 1370 (70.3%)                        | 115 (100%)                         | 86 (98.9%)          |
| Surgical resections                           | 579 (29.7%)                         | 0 (0%)                             | 1 (1.1%)            |
| <b>Diagnosis (worst lesions on the slide)</b> |                                     |                                    |                     |
| Non-dysplastic                                | 527 (27.0%)                         | 28 (24.3%)                         | 21 (24.1%)          |
| Low grade dysplasia                           | 205 (10.5%)                         | 21 (18.3%)                         | 26 (29.9%)          |
| High grade dysplasia                          | 602 (30.9%)                         | 30 (26.1%)                         | 17 (19.5%)          |
| Carcinoma                                     | 615 (31.6%)                         | 36 (31.3%)                         | 23 (26.4%)          |
