# Supplementary material for: Evaluating AI-Assistance for Pathologists in Diagnosing and Grading Laryngeal Lesions
Source: bioRxiv or medRxiv preprint supplement (doi:10.1101/2023.07.23.23292962), 2023-10-06
Supplement: Supplementary file [file media-2.pdf]

|                               |                            | <b>AUC<br/>[95% CI]</b>    | <b>NPV<br/>[95% CI]</b>    | <b>PPV (Precision)<br/>[95% CI]</b> | <b>Sensitivity (Recall)<br/>[95% CI]</b> | <b>Accuracy<br/>[95% CI]</b> | <b>Specificity<br/>[95% CI]</b> | <b>AUC (Precision/Recall)<br/>[95% CI]</b> |
|-------------------------------|----------------------------|----------------------------|----------------------------|-------------------------------------|------------------------------------------|------------------------------|---------------------------------|--------------------------------------------|
| <b>Reference Standard Set</b> | <b>Average (4 classes)</b> | <b>0.878 [0.801-0.937]</b> | <b>0.883 [0.811-0.945]</b> | <b>0.624 [0.439-0.795]</b>          | <b>0.621 [0.452-0.788]</b>               | <b>0.822 [0.748-0.887]</b>   | <b>0.883 [0.815-0.944]</b>      | <b>0.708 [0.543-0.844]</b>                 |
|                               | Non-dysplastic             | 0.916 [0.854-0.962]        | 0.911 [0.851-0.966]        | 0.680 [0.480-0.864]                 | 0.680 [0.517-0.862]                      | 0.861 [0.791-0.922]          | 0.911 [0.849-0.965]             | 0.78 [0.612-0.903]                         |
|                               | Low grade dysplasia        | 0.827 [0.735-0.898]        | 0.882 [0.802-0.95]         | 0.400 [0.219-0.572]                 | 0.545 [0.323-0.750]                      | 0.757 [0.670-0.835]          | 0.806 [0.725-0.882]             | 0.504 [0.29-0.706]                         |
|                               | High grade dysplasia       | 0.827 [0.731-0.905]        | 0.819 [0.736-0.892]        | 0.571 [0.333-0.800]                 | 0.414 [0.240-0.593]                      | 0.774 [0.696-0.844]          | 0.895 [0.829-0.956]             | 0.633 [0.441-0.795]                        |
|                               | Carcinoma                  | 0.942 [0.884-0.982]        | 0.921 [0.857-0.973]        | 0.846 [0.722-0.946]                 | 0.846 [0.727-0.946]                      | 0.896 [0.835-0.948]          | 0.921 [0.855-0.974]             | 0.914 [0.827-0.973]                        |
|                               | All dysplasias             | 0.869 [0.8-0.927]          | 0.797 [0.697-0.889]        | 0.745 [0.619-0.86]                  | 0.745 [0.615-0.863]                      | 0.774 [0.696-0.844]          | 0.797 [0.692-0.887]             | 0.849 [0.754-0.922]                        |
| <b>External Set</b>           | <b>Average (4 classes)</b> | <b>0.886 [0.813-0.947]</b> | <b>0.883 [0.814-0.943]</b> | <b>0.655 [0.432-0.863]</b>          | <b>0.629 [0.464-0.786]</b>               | <b>0.822 [0.741-0.897]</b>   | <b>0.878 [0.796-0.946]</b>      | <b>0.722 [0.543-0.873]</b>                 |
|                               | Non-dysplastic             | 0.89 [0.815-0.948]         | 0.833 [0.747-0.916]        | 0.6 [0.333-0.857]                   | 0.429 [0.217-0.647]                      | 0.793 [0.701-0.885]          | 0.909 [0.836-0.971]             | 0.65 [0.427-0.842]                         |
|                               | Low grade dysplasia        | 0.799 [0.7-0.887]          | 0.818 [0.705-0.909]        | 0.5 [0.324-0.667]                   | 0.615 [0.407-0.792]                      | 0.701 [0.598-0.793]          | 0.738 [0.618-0.843]             | 0.58 [0.381-0.791]                         |
|                               | High grade dysplasia       | 0.863 [0.755-0.951]        | 0.882 [0.805-0.947]        | 0.727 [0.444-1]                     | 0.471 [0.231-0.706]                      | 0.862 [0.793-0.931]          | 0.957 [0.9-1]                   | 0.674 [0.423-0.859]                        |
|                               | Carcinoma                  | 0.994 [0.981-1]            | 1 [1-1]                    | 0.793 [0.625-0.929]                 | 1 [1-1]                                  | 0.931 [0.874-0.977]          | 0.906 [0.83-0.971]              | 0.983 [0.94-1]                             |
|                               | All dysplasias             | 0.831 [0.74-0.908]         | 0.727 [0.581-0.854]        | 0.721 [0.587-0.848]                 | 0.721 [0.581-0.842]                      | 0.724 [0.621-0.816]          | 0.727 [0.58-0.854]              | 0.82 [0.702-0.911]                         |
