# Supplementary material for: Evaluating AI-Assistance for Pathologists in Diagnosing and Grading Laryngeal Lesions
Source: bioRxiv or medRxiv preprint supplement (doi:10.1101/2023.07.23.23292962), 2023-10-06
Supplement: Supplementary file [file media-3.pdf]

| Metric               | Reviewers                 | Non Assisted<br>[95% CI]   | Assisted<br>[95% CI]       | P-value *    |
|----------------------|---------------------------|----------------------------|----------------------------|--------------|
| Linear kappa         | Standalone AI             | /                          | 0.675 [0.578-0.765]        | /            |
|                      | Residents                 | 0.631 [0.524-0.737]        | 0.725 [0.723-0.728]        | 0.168        |
|                      | Non-HN specialists        | 0.665 [0.574-0.755]        | 0.744 [0.713-0.776]        | 0.061        |
|                      | HN specialists            | 0.709 [0.661-0.758]        | 0.718 [0.696-0.740]        | 0.388        |
| Accuracy             | Standalone AI             | /                          | 0.822 [0.748-0.887]        | /            |
|                      | <b>Residents</b>          | <b>0.798 [0.745-0.851]</b> | <b>0.854 [0.816-0.892]</b> | <b>0.004</b> |
|                      | <b>Non-HN specialists</b> | <b>0.819 [0.781-0.857]</b> | <b>0.849 [0.810-0.889]</b> | <b>0.015</b> |
|                      | HN specialists            | 0.835 [0.801-0.868]        | 0.836 [0.805-0.868]        | 0.424        |
| NPV                  | Standalone AI             | /                          | 0.883 [0.811-0.945]        | /            |
|                      | <b>Residents</b>          | <b>0.869 [0.835-0.903]</b> | <b>0.906 [0.877-0.934]</b> | <b>0.013</b> |
|                      | <b>Non-HN specialists</b> | <b>0.881 [0.859-0.903]</b> | <b>0.904 [0.872-0.936]</b> | <b>0.048</b> |
|                      | HN specialists            | 0.892 [0.875-0.908]        | 0.893 [0.876-0.909]        | 0.453        |
| PPV (Precision)      | Standalone AI             | /                          | 0.624 [0.439-0.795]        | /            |
|                      | <b>Residents</b>          | <b>0.567 [0.417-0.717]</b> | <b>0.684 [0.584-0.784]</b> | <b>0.011</b> |
|                      | Non-HN specialists        | 0.623 [0.511-0.735]        | 0.663 [0.550-0.776]        | 0.08         |
|                      | HN specialists            | 0.666 [0.558-0.774]        | 0.645 [0.544-0.747]        | 0.864        |
| Sensitivity (Recall) | Standalone AI             | /                          | 0.621 [0.452-0.788]        | /            |
|                      | <b>Residents</b>          | <b>0.559 [0.402-0.717]</b> | <b>0.68 [0.563-0.797]</b>  | <b>0.034</b> |
|                      | Non-HN specialists        | 0.609 [0.506-0.712]        | 0.665 [0.531-0.8]          | 0.108        |
|                      | HN specialists            | 0.641 [0.547-0.734]        | 0.64 [0.542-0.738]         | 0.507        |
| Specificity          | Standalone AI             | /                          | 0.883 [0.815-0.944]        | /            |
|                      | <b>Residents</b>          | <b>0.868 [0.826-0.911]</b> | <b>0.904 [0.880-0.928]</b> | <b>0.024</b> |
|                      | <b>Non-HN specialists</b> | <b>0.882 [0.845-0.918]</b> | <b>0.902 [0.874-0.93]</b>  | <b>0.035</b> |
|                      | HN specialists            | 0.892 [0.855-0.929]        | 0.893 [0.866-0.919]        | 0.479        |

\* one sided paired t tests. Results with statistical significance are in bold
